# Supplementary material
Source: PubMed Central journal article supplement (PMC8218532)

**Supplemental information**

**Immunogenicity of SARS-CoV-2 messenger**

**RNA vaccines in patients with cancer**

**Alfredo Addeo, Pankil K. Shah, Natacha Bordry, Robert D. Hudson, Brenna Albracht, Mariagrazia Di Marco, Virginia Kaklamani, Pierre-Yves Dietrich, Barbara S. Taylor, Pierre-Francois Simand, Darpan Patel, Jing Wang, Intidhar Labidi-Galy, Sara Fertani, Robin J. Leach, Jose Sandoval, Ruben Mesa, Kate Lathrop, Nicolas Mach, and Dimpy P. Shah**

**Supplementary Fig 1. Differences in anti-SARS-CoV-2 S (anti-S) IgG titers following partial and complete vaccination, stratified by type of vaccine, related to Fig 1**

Similar anti-S antibody titers (U/mL) in patients who received 1 dose of mRNA-1272 or BNT162b2 was observed at timepoint 1. Although not significant, a trend in lower antibody titer for BNT162b2 compared to mRNA-1272 group was observed at timepoint 2 (post 2<sup>nd</sup> vaccination dose). Box plot showing median (horizontal bar), the 25<sup>th</sup> and 75<sup>th</sup> quartiles, and the error bars depicting largest and smallest values. Differences assessed by Kruskal Wallis Test.

**Supplementary Fig 2. Trajectories of anti-SARS-CoV-2 S (anti-S) IgG titers in individual patients over time, stratified by type of vaccine, related to Fig 1**

Trajectories of anti-S antibody titers (U/mL) in individual patients from baseline (pre-vaccination) to timepoint 1 (post 1<sup>st</sup> vaccination dose) to timepoint 2 (post 2<sup>nd</sup> vaccination dose) are shown. These are stratified by type of vaccine. Only 1 patient showed a drop in antibody titer level from timepoint 1 to timepoint 2.

**Supplementary Fig 3. Increase in anti-SARS-CoV-2 S (anti-S) IgG titers following partial and complete vaccination in 9 patients with prior SARS-CoV-2 infection, related to Fig 1**

Anti-S antibody titers (U/mL) increased after partial (timepoint 1) and complete vaccination (timepoint 2) in 9 patients with prior SARS-CoV-2 infection defined by presence of anti-SARS-CoV-2 nucleocapsid IgG at baseline. Box plot showing median

(horizontal bar), the 25<sup>th</sup> and 75<sup>th</sup> quartiles, and the error bars depicting largest and smallest values. Statistical significance testing was not performed due to small numbers.

**Supplementary Table 1 Clinical characteristics of patients with prior SARS-CoV-2 infection who received vaccination, related to Table 1**

|                                                                                   |              |
|-----------------------------------------------------------------------------------|--------------|
| N                                                                                 | 9            |
| Age, years, median (IQR)                                                          | 56 (56 – 60) |
| Sex                                                                               |              |
| Male                                                                              | 3 (33%)      |
| Female                                                                            | 6 (67%)      |
| Race                                                                              |              |
| Non-Hispanic White                                                                | 7 (78%)      |
| Hispanic                                                                          | 1 (11%)      |
| Black                                                                             | 1 (11%)      |
| Type of Malignancy                                                                |              |
| Solid Malignancies                                                                | 6 (67%)      |
| Breast                                                                            | 3            |
| Urological                                                                        | 1            |
| Thoracic malignancy                                                               | 1            |
| Connective tissue                                                                 | 1            |
| Hematological malignancies                                                        | 3 (33%)      |
| Diffuse large B cell lymphoma                                                     | 6            |
| Follicular lymphoma                                                               | 2            |
| MALT lymphoma                                                                     | 2            |
| T-cell Lymphoma/Mycosis Fungoides                                                 | 2            |
| Hodgkin's lymphoma                                                                | 4            |
| Myeloma                                                                           | 5            |
| Type of anti-cancer treatment <sup>b</sup> (within 6 months prior to vaccination) |              |
| Clinical surveillance                                                             | 3 (33%)      |
| Cytotoxic chemotherapy                                                            | 1 (11%)      |
| Immunotherapy                                                                     | 1 (11%)      |
| Endocrine therapy                                                                 | 2 (22%)      |
| Kinase Inhibitor                                                                  | 1 (11%)      |
| Surgery                                                                           | 1 (1%)       |
| SARS-CoV-2 Vaccine                                                                |              |
| BNT162b2                                                                          | 3 (33%)      |
| mRNA-1273                                                                         | 6 (67%)      |

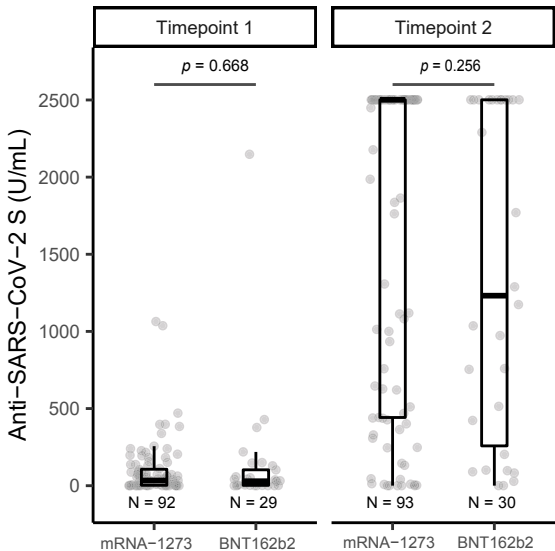

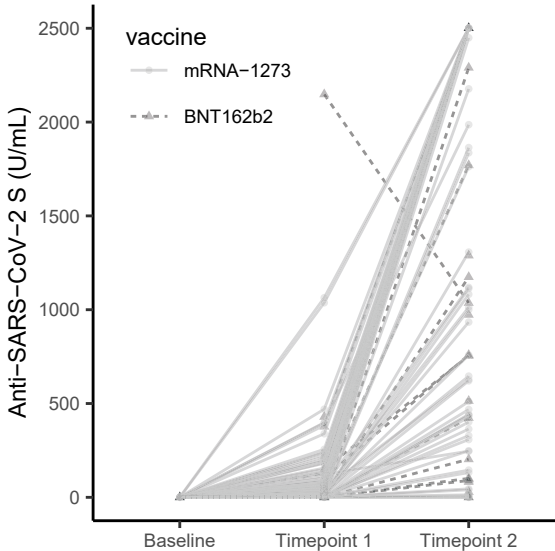

Anti-SARS-CoV-2 S (U/mL)

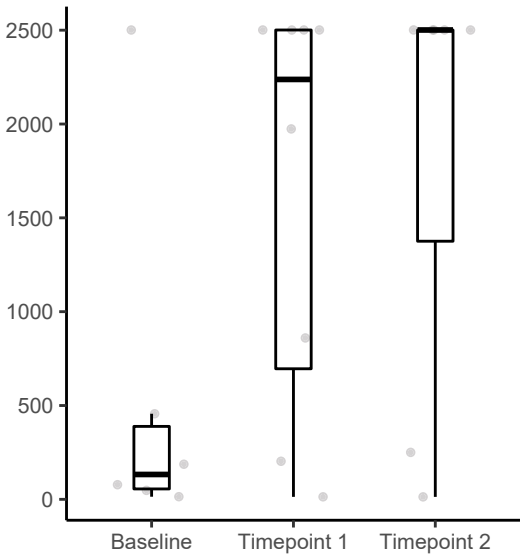

Supplement: mmc1.pdf [file mmc1.pdf]
